# Supplementary material
Source: PubMed Central journal article supplement (PMC2933096)

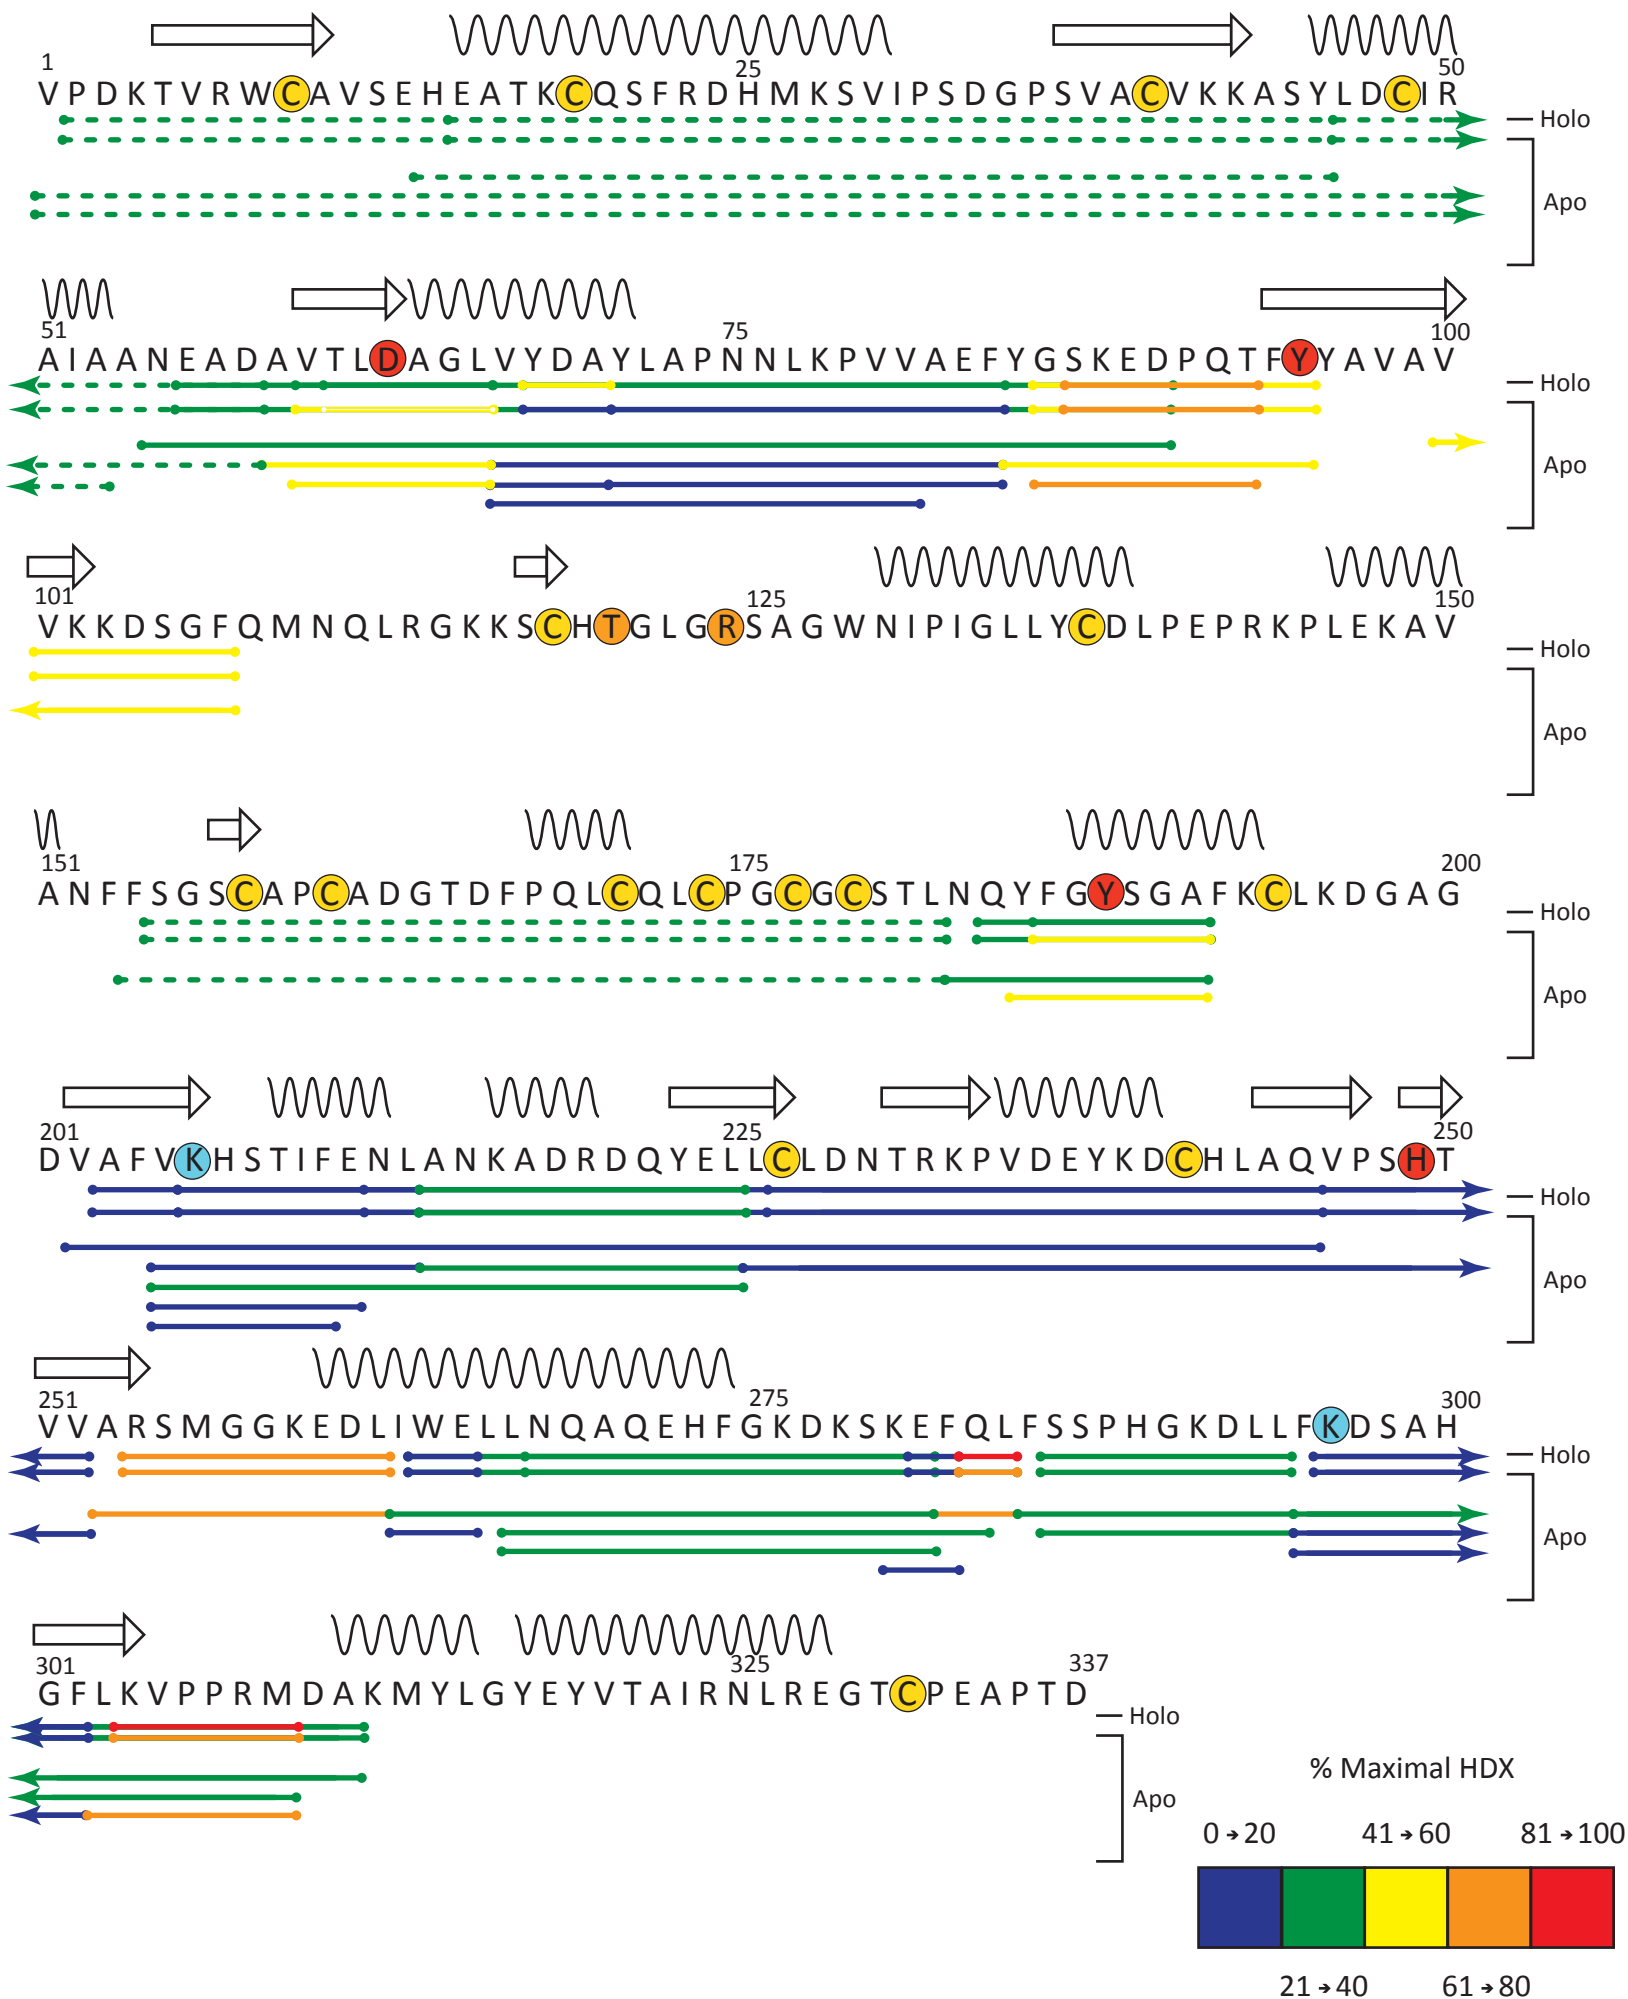

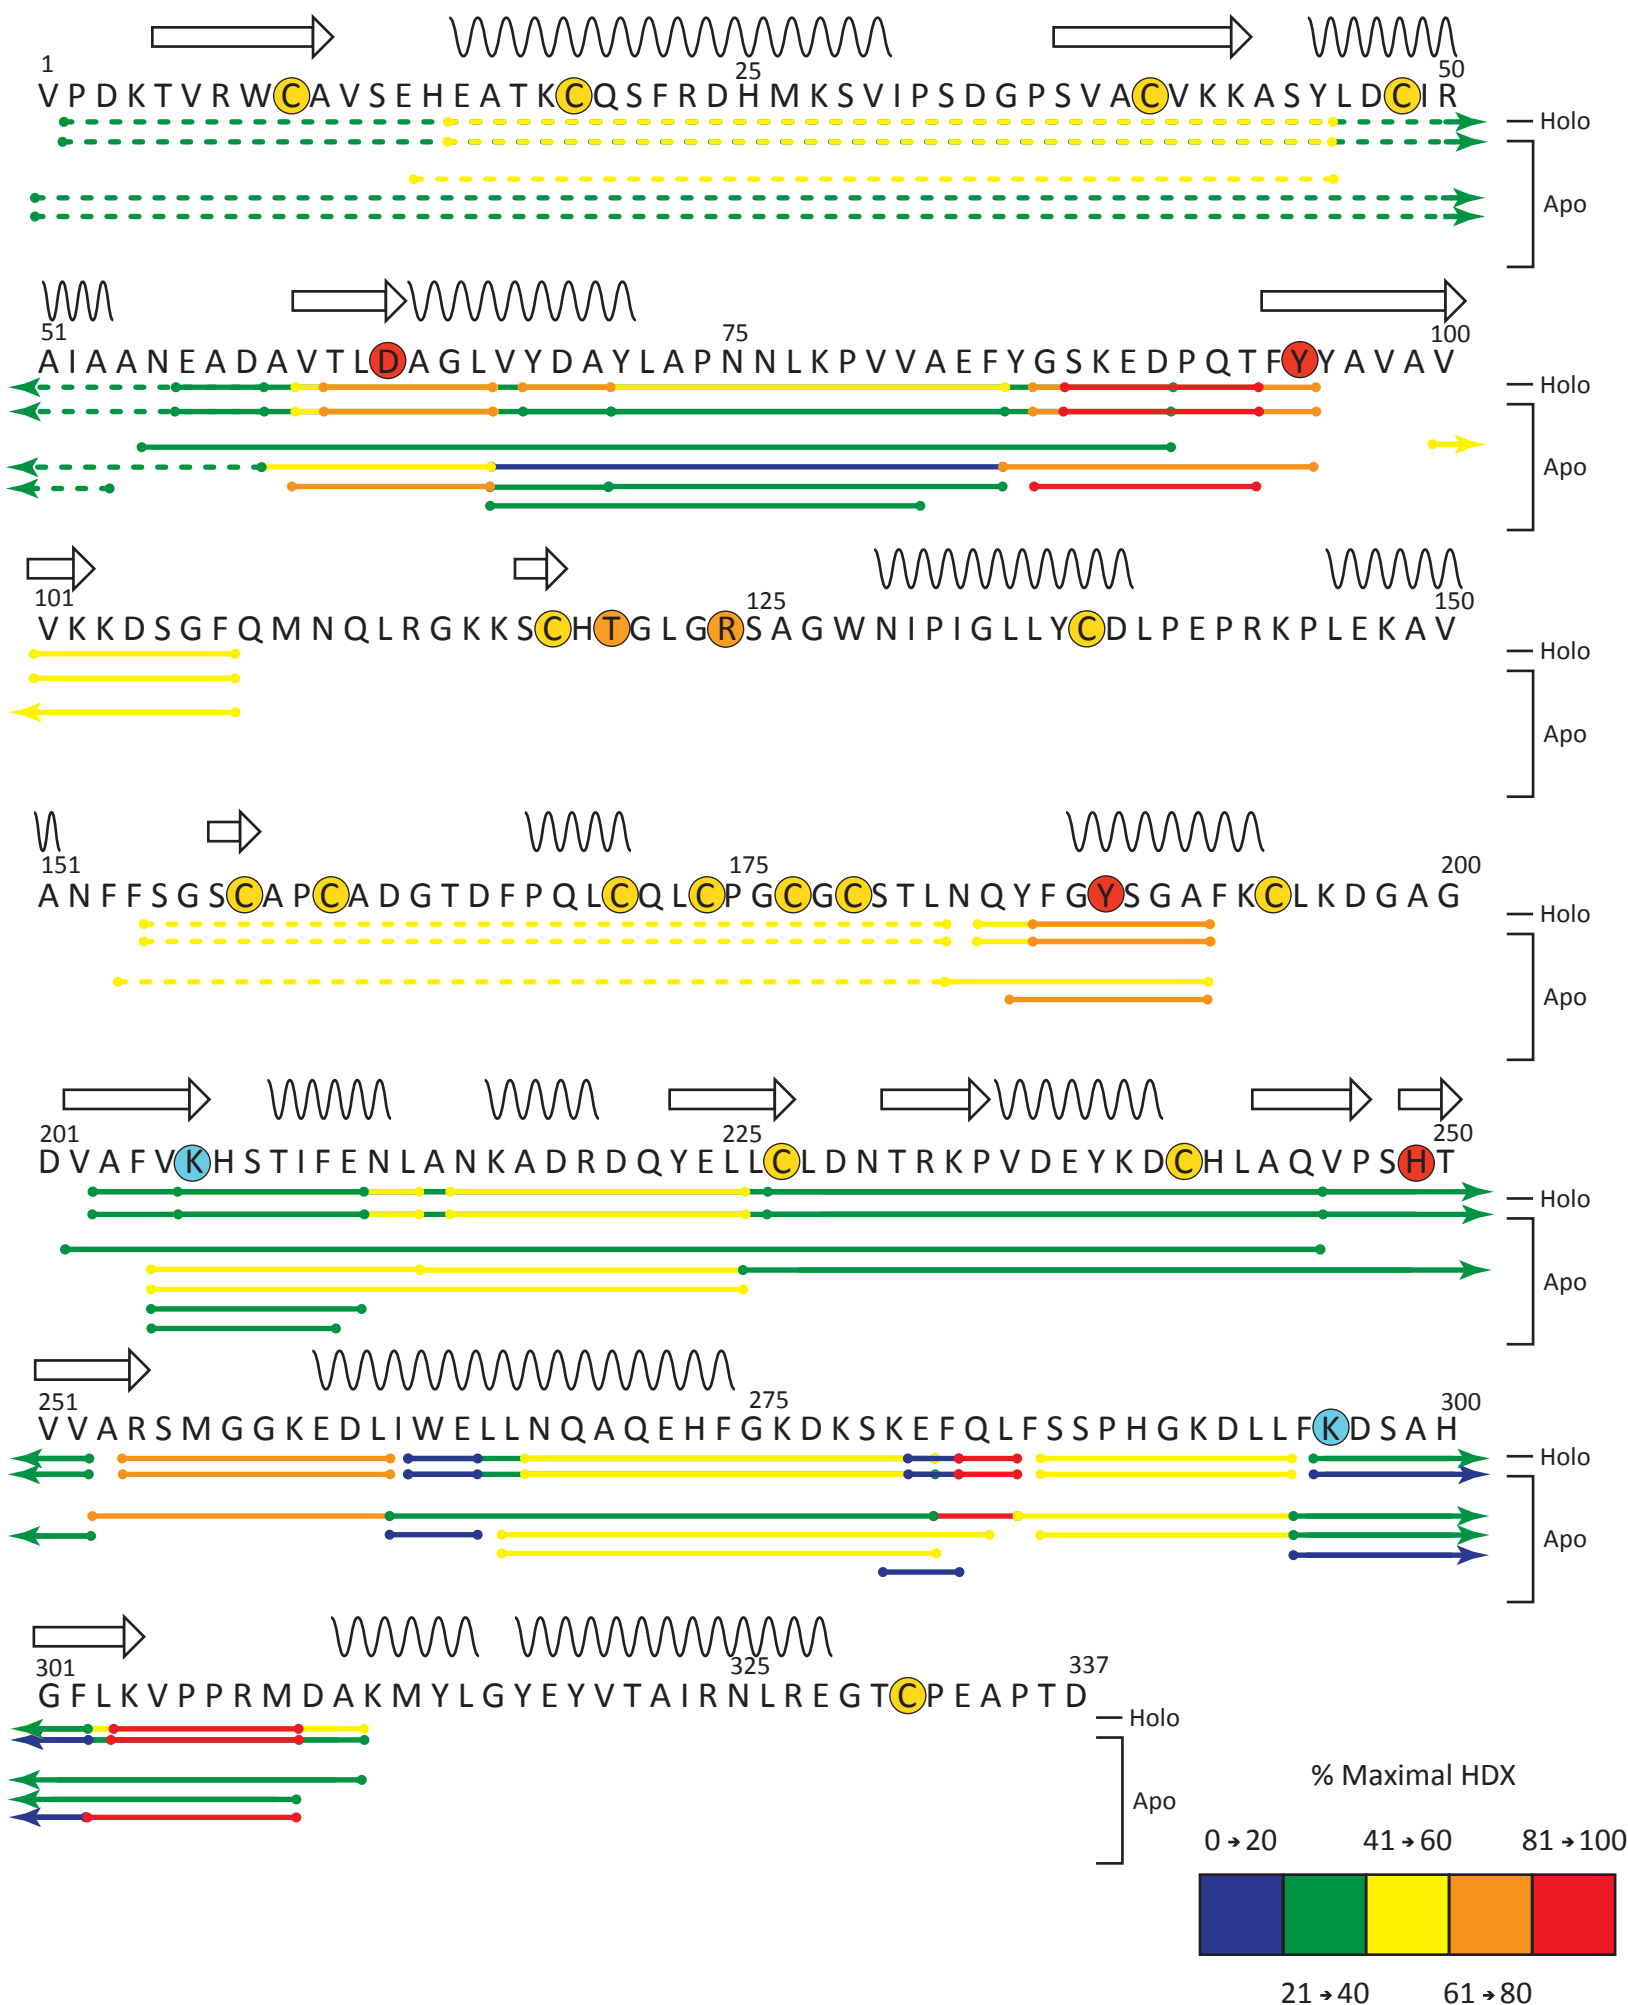

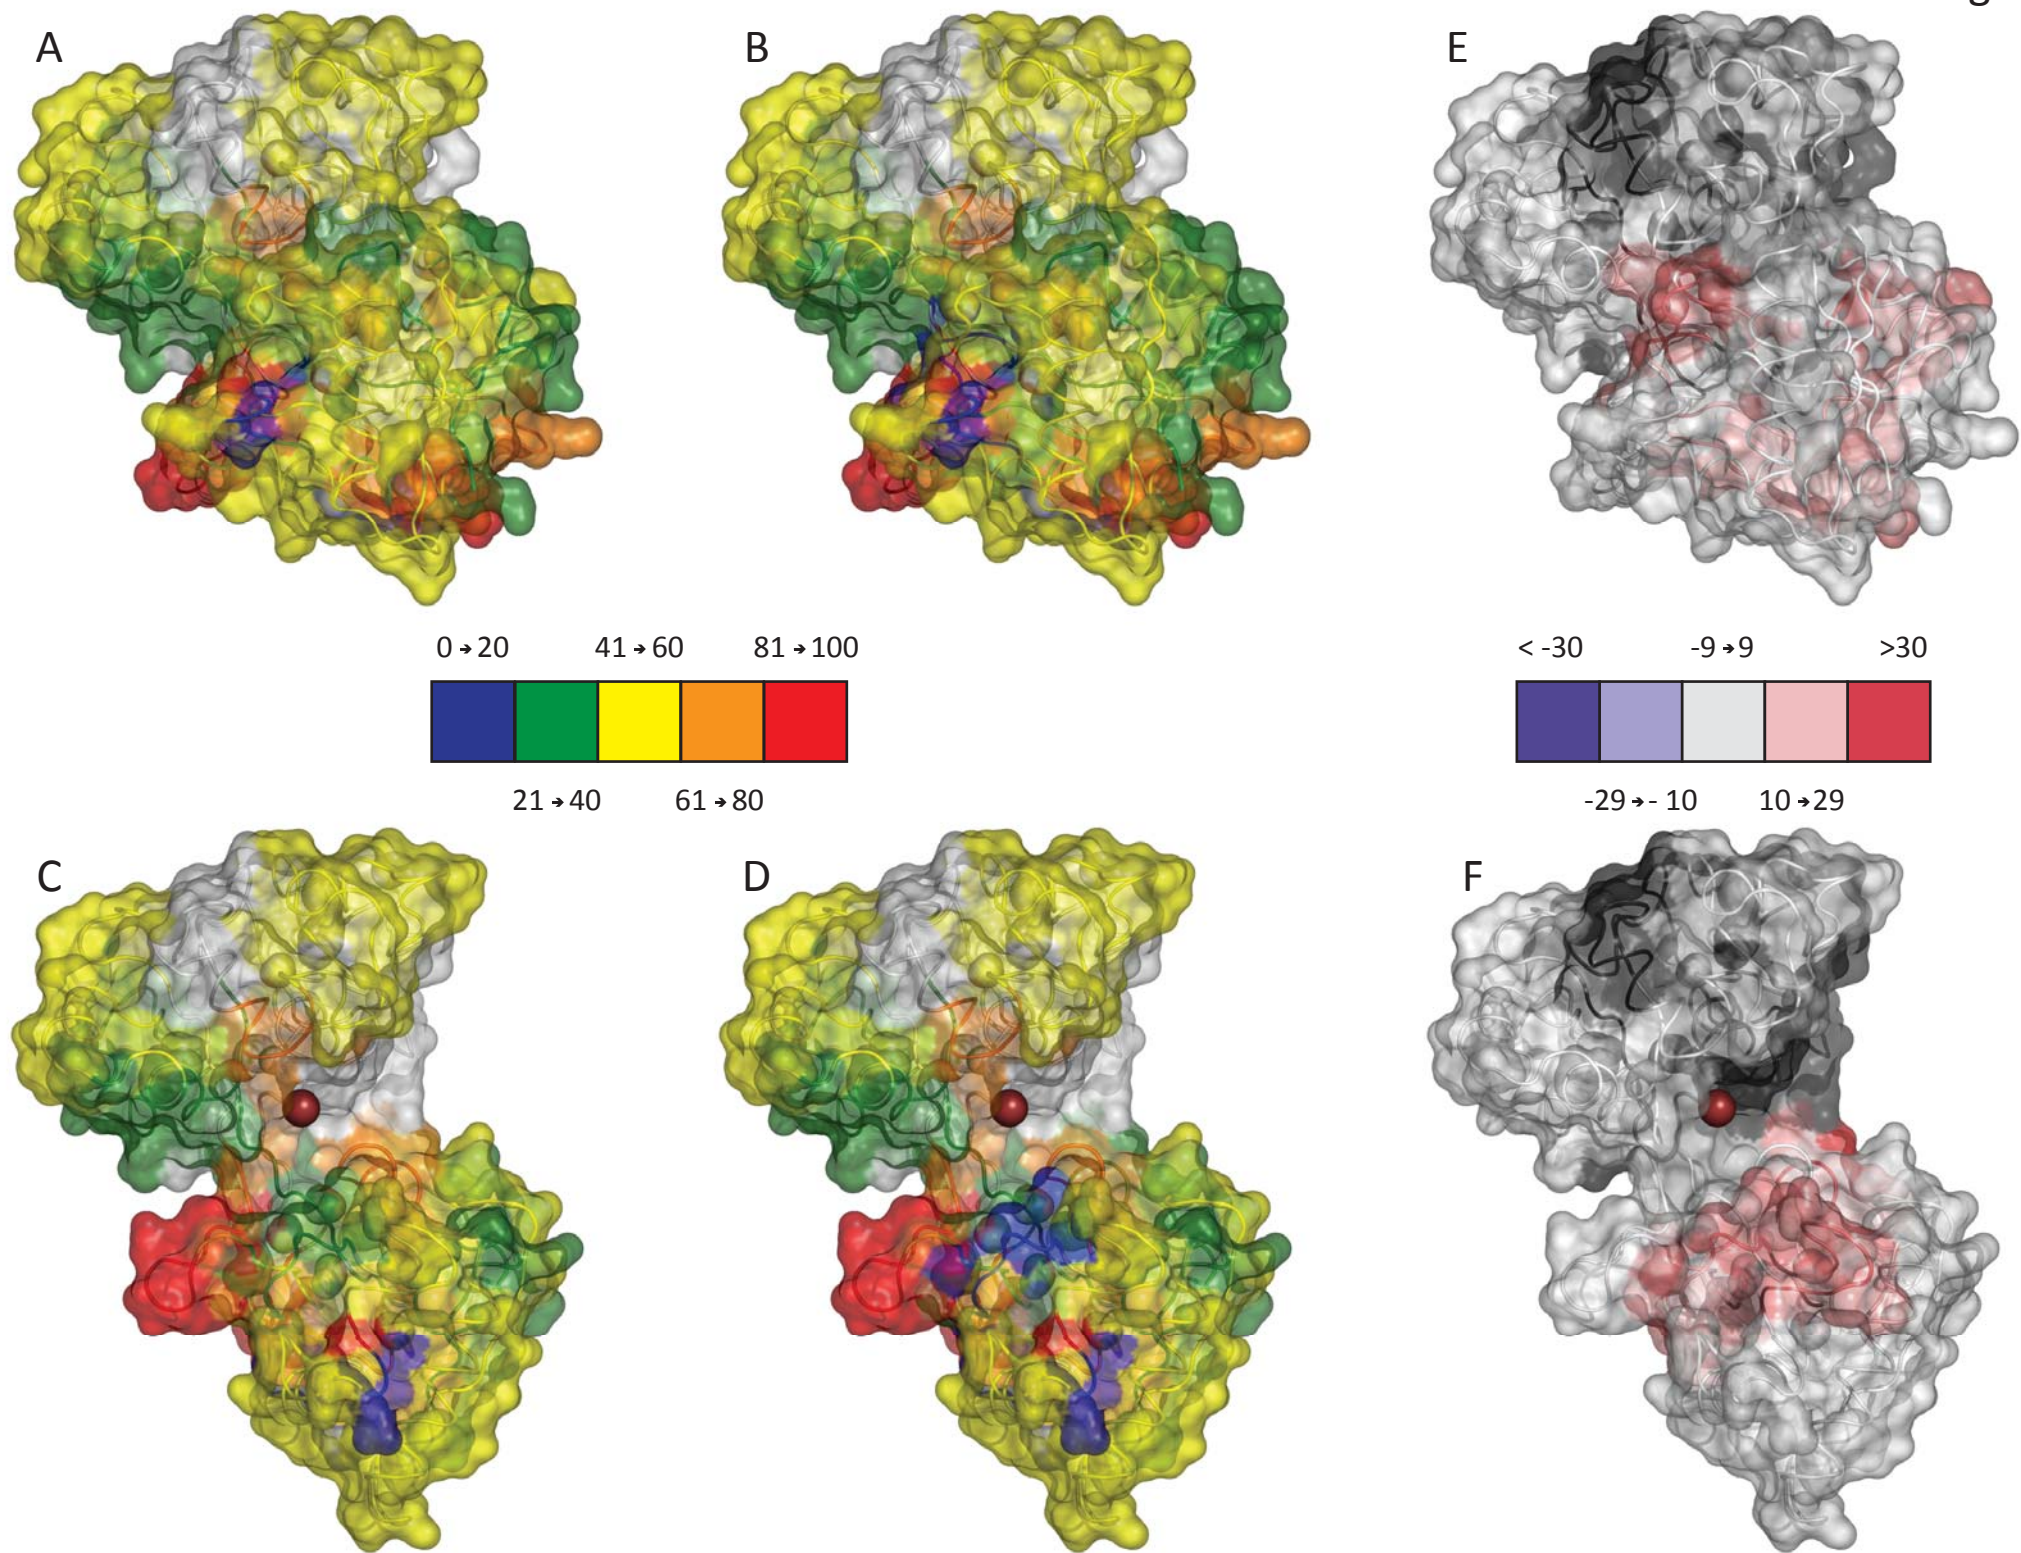

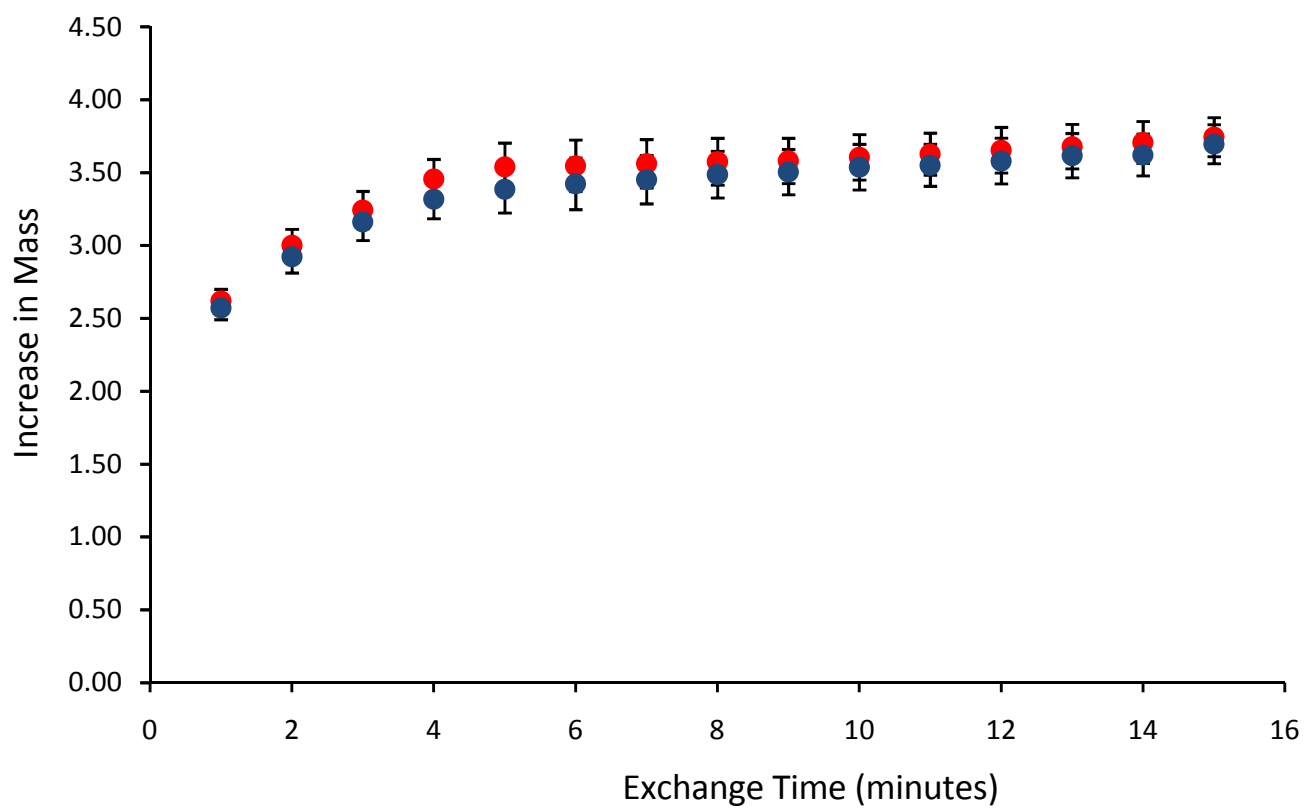

Supplement: NIHMS223785-supplement-1.pdf [file NIHMS223785-supplement-1.pdf]
